# Supplementary material for: Topical SCD-153, a 4-methyl itaconate prodrug, for the treatment of alopecia areata
Source: PubMed Central journal article supplement — PNAS Nexus. 2022 Dec 16;2(1):pgac297. doi: 10.1093/pnasnexus/pgac297 (PMC9832969; doi:10.1093/pnasnexus/pgac297), 2022-12-16
Supplement: pgac297_supplemental_file.pdf [file pgac297_supplemental_file.pdf]

## SUPPLEMENTARY METHODS

### *Synthesis of SCD-153 and analytical measurements*

4-methyl itaconate (11 g, 76.3 mmol), chloromethyl isopropyl carbonate (11.2 mL, 83.9 mmol), sodium iodide (2.28 g, 15.0 mmol), and potassium carbonate (15.82 g, 114.0 mmol) were mixed in anhydrous acetonitrile (120 mL) and the mixture was stirred for 16 hours at 55 °C. Volatiles were evaporated, residue was redissolved in ethyl acetate (200 mL) and the mixture was washed with brine (100 mL) and saturated solution of sodium thiosulfate (30 mL). The organic phase was dried over Na<sub>2</sub>SO<sub>4</sub>, volatiles were evaporated, and the residue was subjected to flash column chromatography (Silicagel 60 mesh 70-230, solvent: cyclohexane/ethyl acetate 5:1) to afford 18.6 g (94%) of compound SCD-153 as colorless oil.

<sup>1</sup>H NMR (401 MHz, CDCl<sub>3</sub>): δ<sub>H</sub> 1.31 (d, *J* = 6.3 Hz, 6H), 3.35 (s, 2H), 3.69 (s, 3H), 4.91 (p, *J* = 6.2 Hz, 1H), 5.81 – 5.83 (m, 3H), 6.43 (s, 1H).

<sup>13</sup>C NMR (101 MHz, CDCl<sub>3</sub>): δ<sub>C</sub> 21.64, 37.20, 52.12, 73.10, 82.20, 130.50, 132.76, 153.29, 164.52, 170.77.

ESI MS: 283.0 ([M + Na]<sup>+</sup>).

HRMS (ESI): Calcd. for C<sub>11</sub>H<sub>16</sub>O<sub>7</sub>Na 283.07882. Found: 283.07911.

## SUPPLEMENTARY TABLES

**Table S1.** Quantification of itaconate release with high resolution mass spectrometry in studies on the metabolic stability of SCD-153 in mouse and human skin homogenates

| Sample Name                                         | Type   | Vol. | Pos.   | RT    | Area     | Itaconic Acid Final Conc. |
|-----------------------------------------------------|--------|------|--------|-------|----------|---------------------------|
| Itaconic acid (100 ng/mL)                           | Cal    | 4    | Vial 2 | 3.611 | 939861.3 | 100.63852                 |
| Itaconic acid (20 ng/mL)                            | Cal    | 4    | Vial 3 | 3.609 | 282325   | 19.209151                 |
| Itaconic acid (4 ng/mL)                             | Cal    | 4    | Vial 4 | 3.609 | 71328.84 | 4.5090231                 |
| Itaconic acid (0.8 ng/mL)                           | Cal    | 4    | Vial 5 | 3.604 | 15111.8  | 0.8936816                 |
| Itaconic acid (0.16 ng/mL)                          | Cal    | 4    | Vial 6 | 3.608 | 2968.155 | 0.1268338                 |
| Blank                                               | Blank  | 4    | Vial 7 | 3.727 | 184.1349 | <b>BLQ</b>                |
| SCD-153 Mouse Skin Homogenate, 0 min, replicate #1  | Sample | 4    | P1-A1  |       |          | <b>BLQ</b>                |
| SCD-153 Mouse Skin Homogenate, 0 min, replicate #2  | Sample | 4    | P1-A2  | 3.711 | 243.1378 | <b>BLQ</b>                |
| SCD-153 Human Skin Homogenate, 0 min, replicate #1  | Sample | 4    | P1-B1  | 3.754 | 165.9919 | <b>BLQ</b>                |
| SCD-153 Human Skin Homogenate, 0 min, replicate #2  | Sample | 4    | P1-B2  | 3.711 | 366.3168 | <b>BLQ</b>                |
| SCD-153 Mouse Skin Homogenate, 30 min, replicate #1 | Sample | 4    | P1-C1  | 3.606 | 217.7789 | <b>BLQ</b>                |
| SCD-153 Mouse Skin Homogenate, 30 min, replicate #2 | Sample | 4    | P1-C2  | 3.701 | 236.2433 | <b>BLQ</b>                |
| SCD-153 Human Skin Homogenate, 30 min, replicate #1 | Sample | 4    | P1-D1  | 3.734 | 206.9302 | <b>BLQ</b>                |
| SCD-153 Human Skin Homogenate, 30 min, replicate #2 | Sample | 4    | P1-D2  | 3.725 | 149.624  | <b>BLQ</b>                |
| SCD-153 Mouse Skin Homogenate, 60 min, replicate #1 | Sample | 4    | P1-E1  | 3.606 | 1099.623 | <b>BLQ</b>                |
| SCD-153 Mouse Skin Homogenate, 60 min, replicate #2 | Sample | 4    | P1-E2  | 3.611 | 1022.227 | <b>BLQ</b>                |
| SCD-153 Human Skin Homogenate, 60 min, replicate #1 | Sample | 4    | P1-F1  | 3.704 | 259.8477 | <b>BLQ</b>                |
| SCD-153 Human Skin Homogenate, 60 min, replicate #2 | Sample | 4    | P1-F2  | 3.703 | 104.8361 | <b>BLQ</b>                |

BLQ, below limit of quantification

**SUPPLEMENTARY FIGURES**

| Treatments                   | Strength (%) | n | Hair growth on day 28 | Photographs on Day 28                                                              |
|------------------------------|--------------|---|-----------------------|------------------------------------------------------------------------------------|
| Vehicle (DMSO), QD x 23 days | 0            | 9 | 1/9                   |  |
| Tofacitinib, QD x 23 days    | 3            | 9 | 9/9                   |  |
| Tofacitinib, QD x 23 days    | 5            | 9 | 9/9                   |  |

**Figure S1. Topical application of 3% or 5% tofacitinib daily for 23 days induces significant hair growth in C57BL/6 mice.** Female C57BL/6 mice underwent hair clipping at 8 weeks after birth (during telogen phase of hair growth cycle), followed by daily treatment on the dorsal right side with vehicle (DMSO), 3% tofacitinib, or 5% tofacitinib for 23 days. Photographs were taken 5 days after the last dose. QD, daily.
